# Supplementary material for: Biocompatible AgInS2@hydrogel microelectrode with enhanced photoelectrochemical sensitivity for real-time in vivo dopamine monitoring
Source: Royal Society of Chemistry journal article supplement (doi:10.1039/d5an00372e), 2025-01-01
Supplement: d5an00372e1.pdf [file d5an00372e1.pdf]

## Electronic Supplementary Information

### Biocompatible AgInS<sub>2</sub>@hydrogel microelectrode with enhanced photoelectrochemical sensitivity for real-time *in vivo* dopamine monitoring

Shiting Gu and Zhonghai Zhang\*

School of Chemistry and Molecular Engineering, East China Normal University,

Shanghai 200241, China

E-mail: [zhzhang@chem.ecnu.edu.cn](mailto:zhzhang@chem.ecnu.edu.cn)

#### Synthesis of PEG-BA

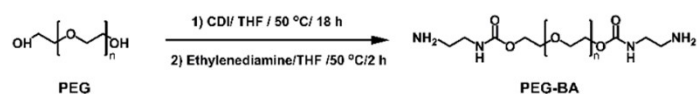

#### Synthesis of PR

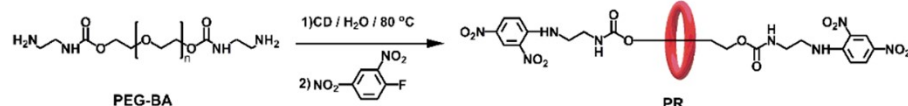

#### Synthesis of PR-PEGMA

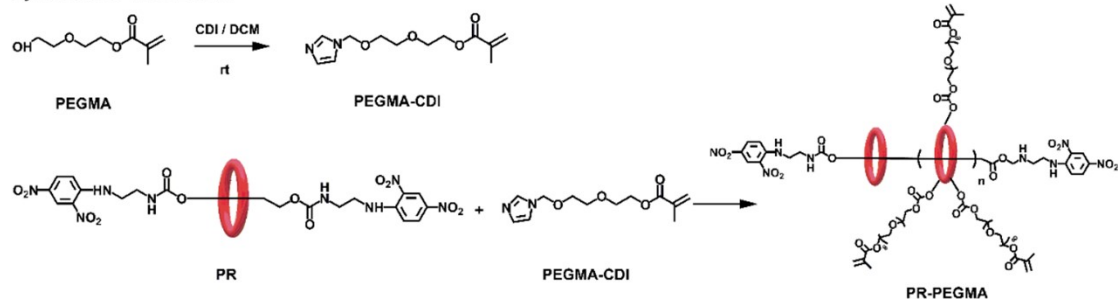

**Fig. S1** Synthesis of PR-PEGMA.

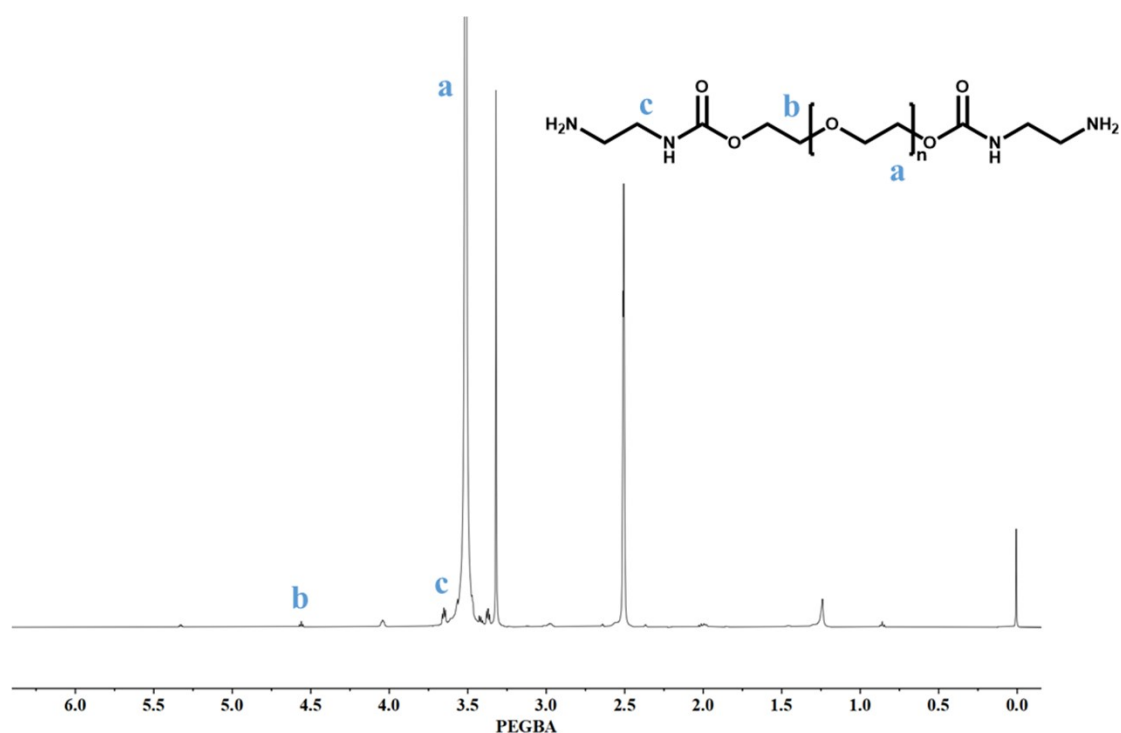

**Fig. S2** <sup>1</sup>H NMR spectrum of PEG-BA in DMSO-d<sub>6</sub>. The NM signals at  $\delta = 3.5$ , 3.6, and 4.5 ppm corresponded to Ha, Hb, and Hc in the PEGBA chain, respectively, which proved the successful synthesis of the PRGBA molecule.

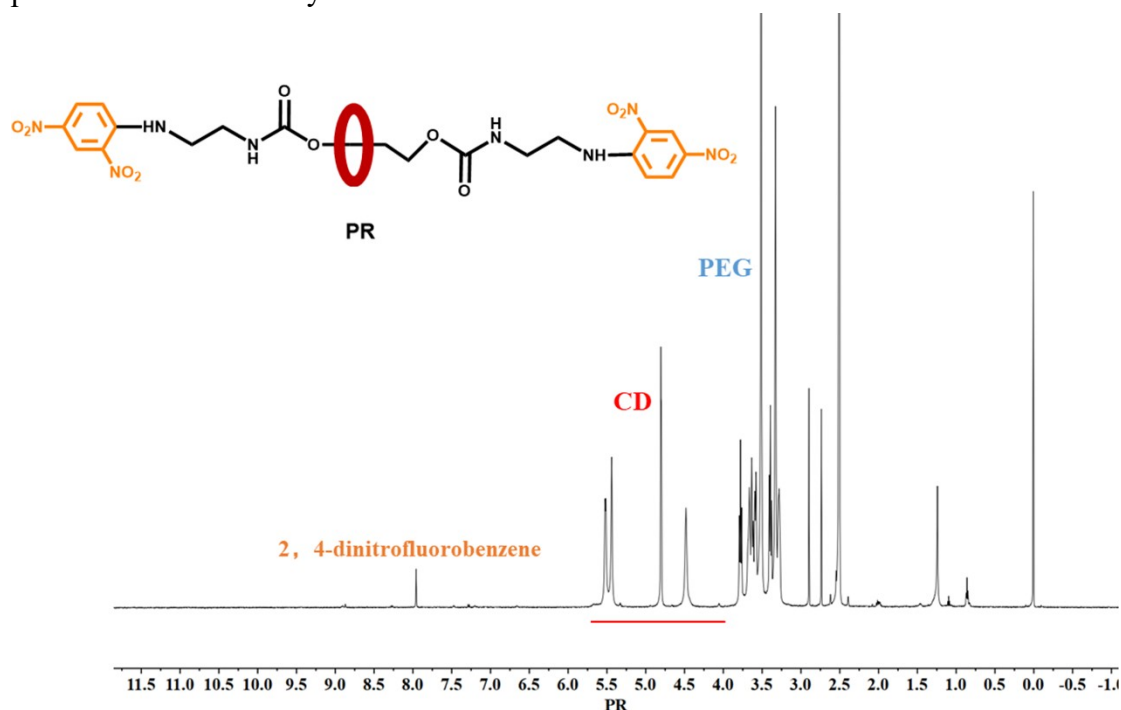

**Fig. S3** <sup>1</sup>H NMR spectrum of PR in DMSO-d<sub>6</sub>. The NM signals at  $\delta = 3.2$ -5.8 ppm corresponded to the hydrogen signals in CD, and those at  $\delta = 7.3$ , 7.5, and 8.2 ppm corresponded to the 2,4- hydrogen signals in dinitrofluorobenzene, proving that the CD was encapsulated in the PR chain capped with 2,4-dinitrofluorobenzene, and the PRGMA molecule was successfully synthesized.

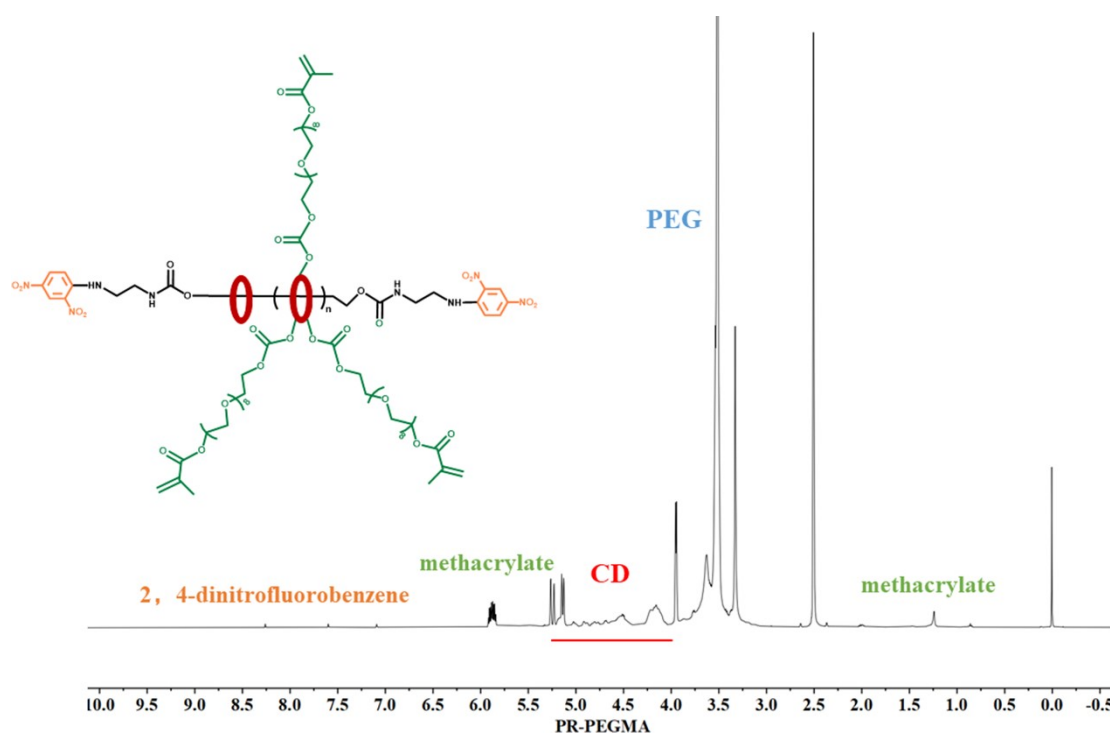

**Fig. S4**  $^1\text{H}$  NMR spectrum of PR-PEGMA in  $\text{DMSO-d}_6$ . The NM signals at  $\delta = 1.2, 5.9$  ppm corresponded to hydrogen signals in methacrylates in PEGMA, proving that the PEGMA side chain was successfully attached to the CD molecule sliding on the PEG backbone by the formylation reaction on the PEG main chain, and the PR-PEGMA molecule was successfully synthesized.

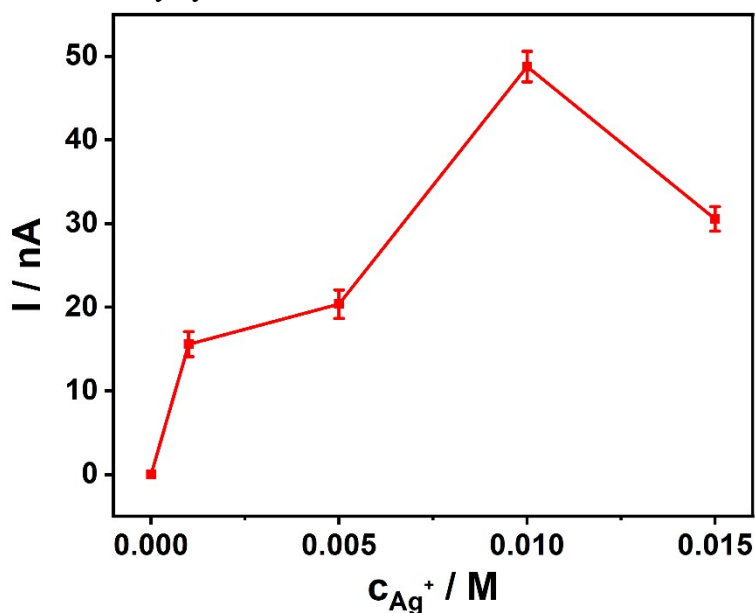

**Fig. S5** Photocurrent responses of  $\text{AgInS}_2@\text{Gel}$  with different concentrations of  $\text{Ag}^+$ .

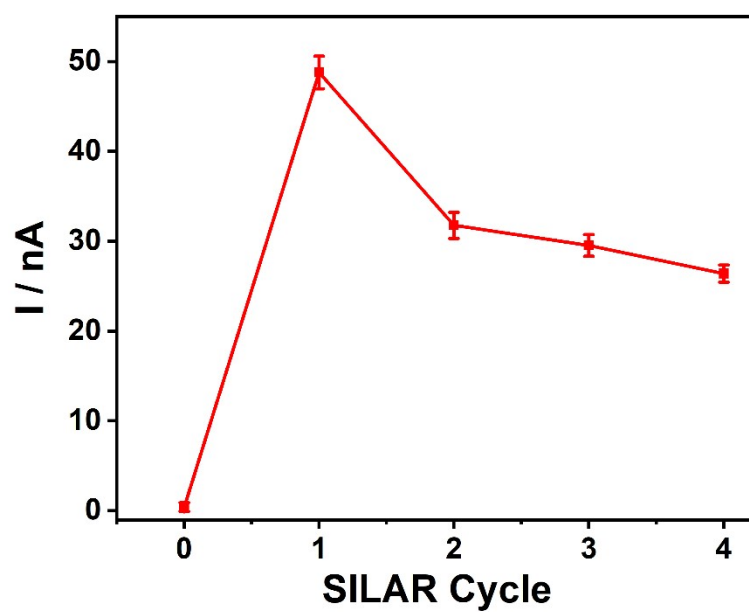

**Fig. S6** Photocurrent response of AgInS<sub>2</sub>@Gel with different SILAR cycle.

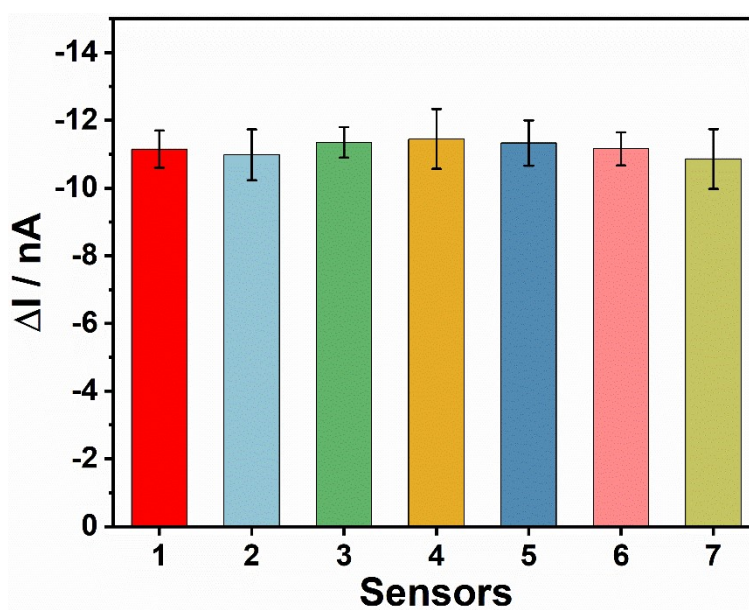

**Fig. S7** Photocurrent Response of different AgInS<sub>2</sub>@Gel biosensors to 100 nM DA.

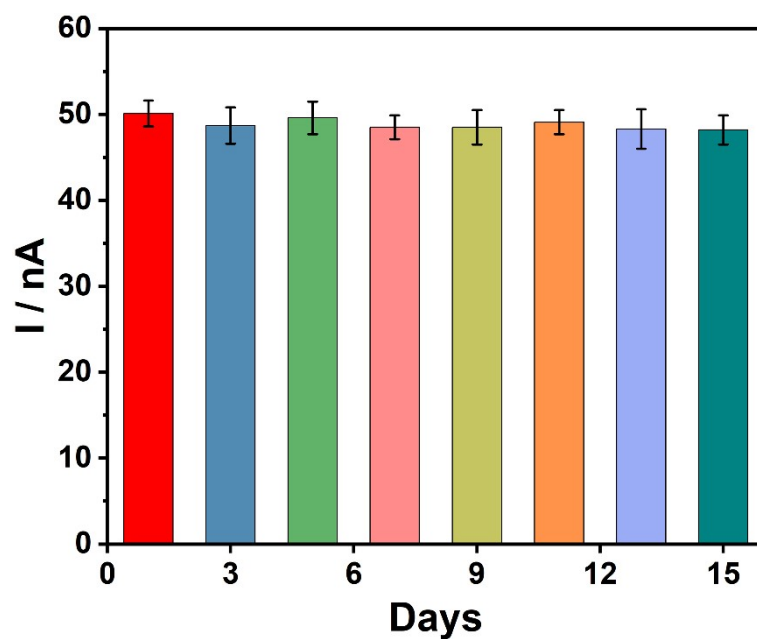

**Fig. S8** Photocurrent of AgInS<sub>2</sub>@Gel biosensor stored in PBS (10 mM, pH 7.4) solution for 15 days.

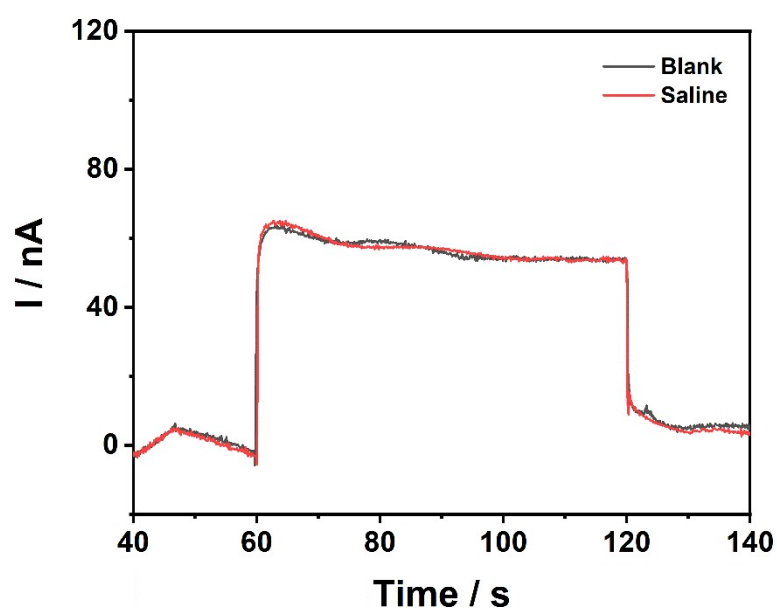

**Fig. S9** Dynamic change of photocurrent of AgInS<sub>2</sub>@hydrogel in the striatum after injection of NM-maleate (20 mg/kg).

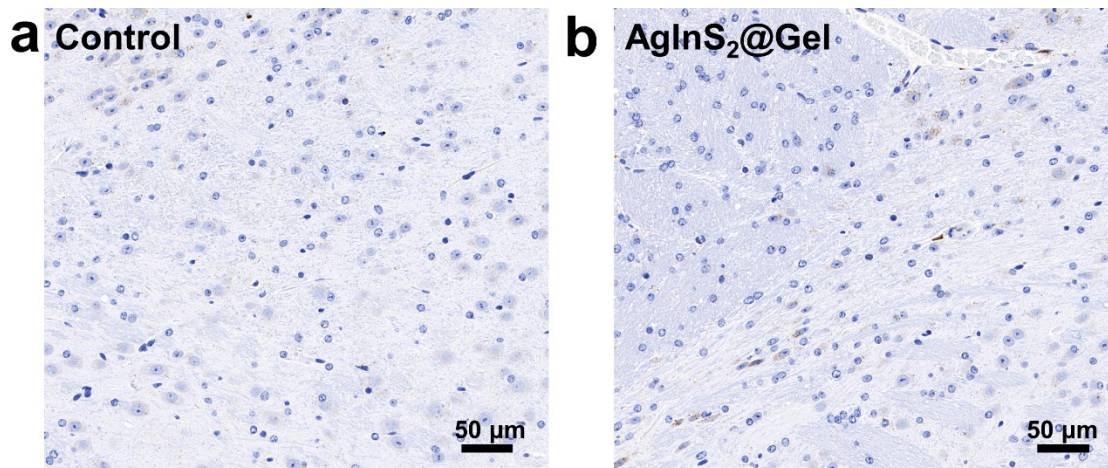

**Fig. S10** Immunohistochemistry of Iba1 expression in brain tissue before and after PEC detection with AgInS<sub>2</sub>@ hydrogel.

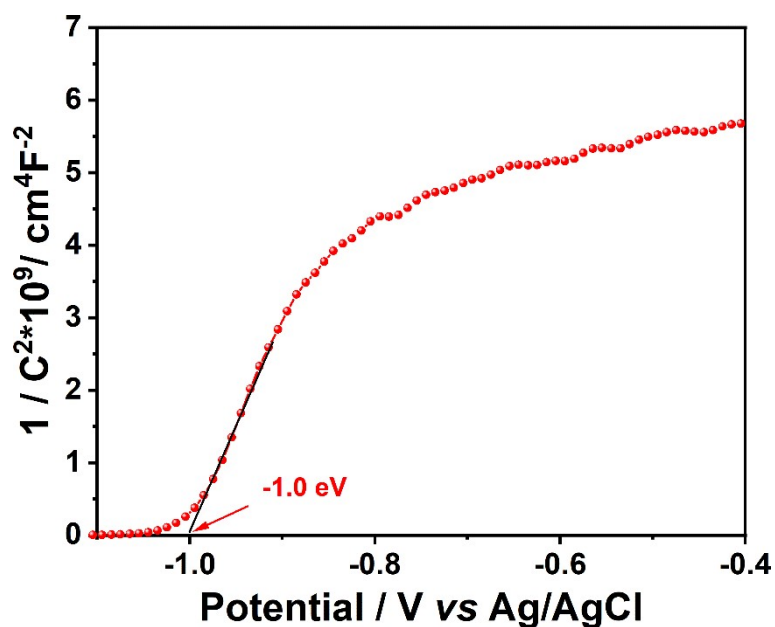

**Fig. S11** Mott-Schottky curve of AgInS<sub>2</sub>. Mott-Schottky analysis of AgInS<sub>2</sub> yielded a flat band potential of -1.0 V vs. Ag/AgCl (equivalent to -0.8 V vs. NHE after potential conversion), which is approximately equal to the position at the bottom of the conduction band (CB). The valence band (VB) position was then calculated as 1.43 V vs. NHE using the relationship  $E_{VB} = E_{CB} + E_g$ .
